# Supplementary material for: An Optimized Workflow for Digital Surface Model Series Generation Based on Historical Aerial Images: Testing and Quality Assessment in the Beach-Dune System of Sa Ràpita-Es Trenc (Mallorca, Spain)
Source: MDPI journal article supplement (doi:10.3390/rs15082044), 2023-04-12
Supplement: s1 [file s1]

Archive with 1 entries (1 files):
- remotesensing-2280348-Supplementary Material.pdf
