# Supplementary material for: An Optimized Workflow for Digital Surface Model Series Generation Based on Historical Aerial Images: Testing and Quality Assessment in the Beach-Dune System of Sa Ràpita-Es Trenc (Mallorca, Spain)
Source: MDPI journal article supplement (doi:10.3390/rs15082044), 2023-04-12
Supplement: s1 [file s1 › remotesensing-2280348-Supplementary Material.pdf]

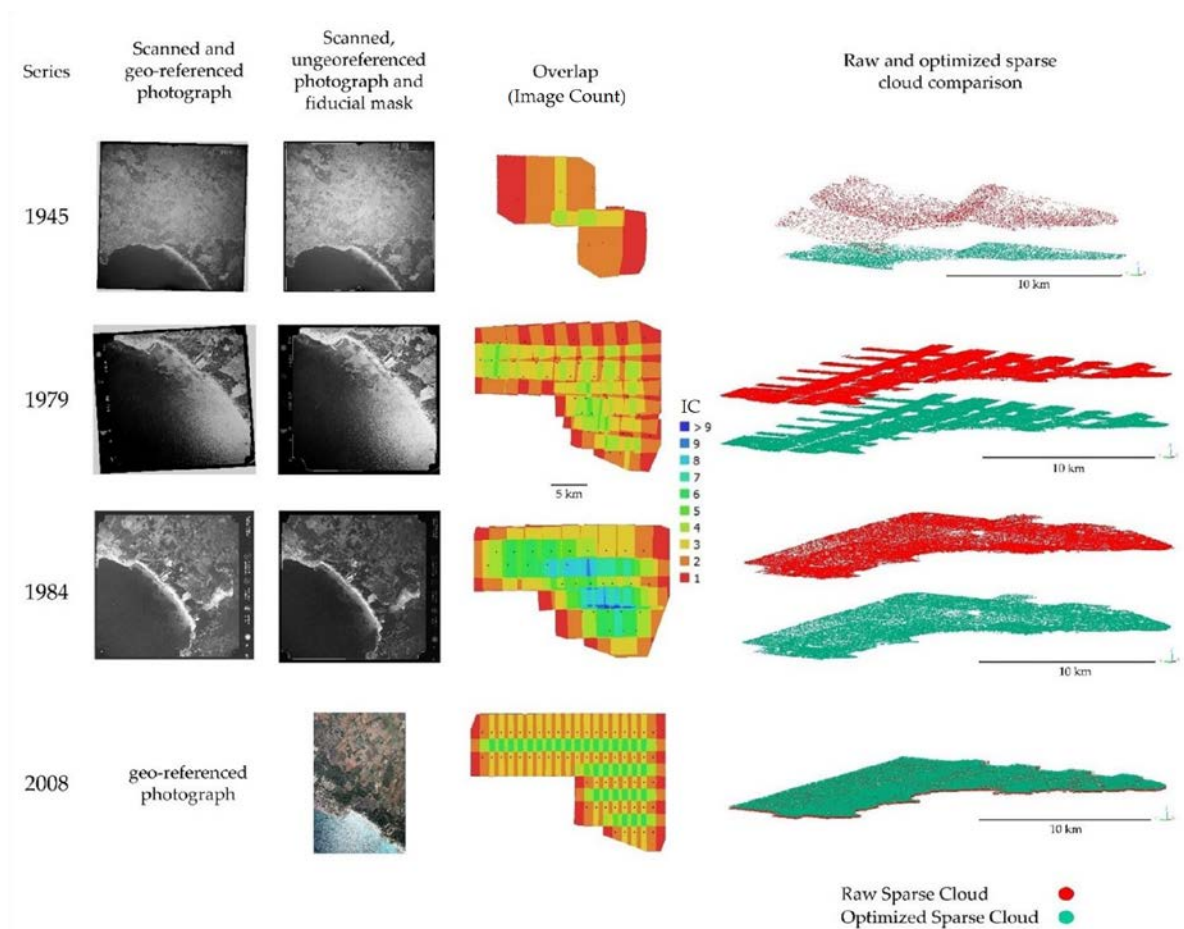

**Figure S1.** Overlap characteristics of the historical aerial image datasets and comparison among raw and optimized sparse cloud series.

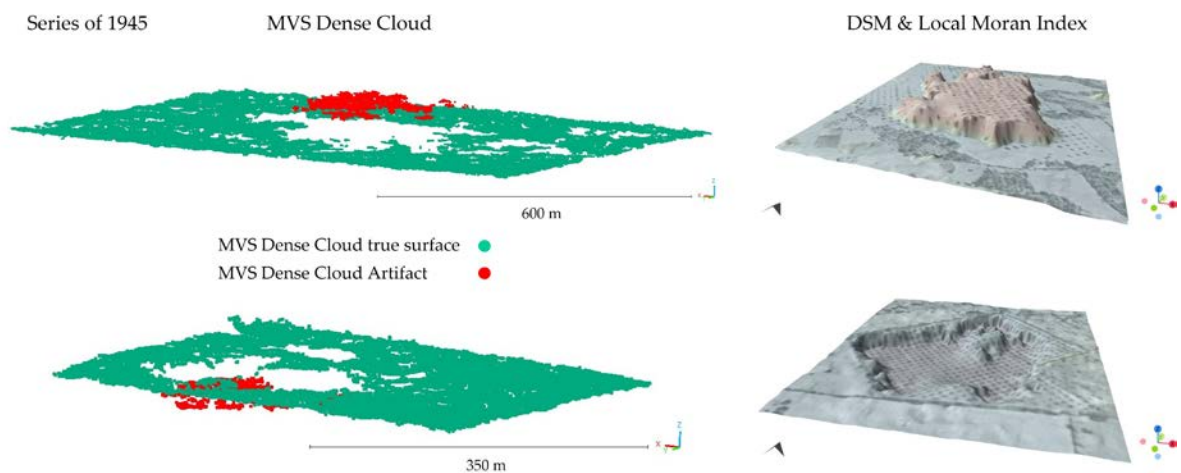

**Figure S2.** Detail of the butte-shaped artifact generated in the 1945 DSM.

**Table S1.** Dense cloud series processing data and product main characteristics  
\*.

| Series | Image Quality Resolution | Depth Filter | Process time | Dense cloud (nb.) | Filtered points (%) (confidence < 1 | Dense filtered cloud (nb.) | Elevation MAE (m) |
|--------|--------------------------|--------------|--------------|-------------------|-------------------------------------|----------------------------|-------------------|
| 1945   | Medium                   | Aggressive   | 8 m 43 s     | 9195308           | 16.81                               | 7649539                    | 8.22              |
| 1979   | Medium                   | Aggressive   | 42 m 9 s     | 22715067          | 19.03                               | 18390230                   | 1.74              |
| 1984   | Medium                   | Aggressive   | 3 h 44 m     | 82669205          | 12.78                               | 72103798                   | 1.58              |
| 2008   | High                     | Mild         | 9 h 47 m     | 359331712         | 11.92                               | 316495119                  | 0.91              |

\* As an intermediate quality step in the MVS process, the elevation accuracy of the MVS dense clouds was measured as the difference between the elevation reference *ALS-Validation Points* (2019) and the predicted elevations at each MVS cloud closest point. We calculate the Mean Absolute Error (MAE) from the linear relationship between the ALS 2019 elevations and those predicted by each MVS cloud.
